# Supplementary material
Source: PubMed Central journal article supplement (PMC3234833)
Supplement: supp_M111.256909_jbc.M111.256909-1.pdf [file supp_M111.256909_jbc.M111.256909-1.pdf]

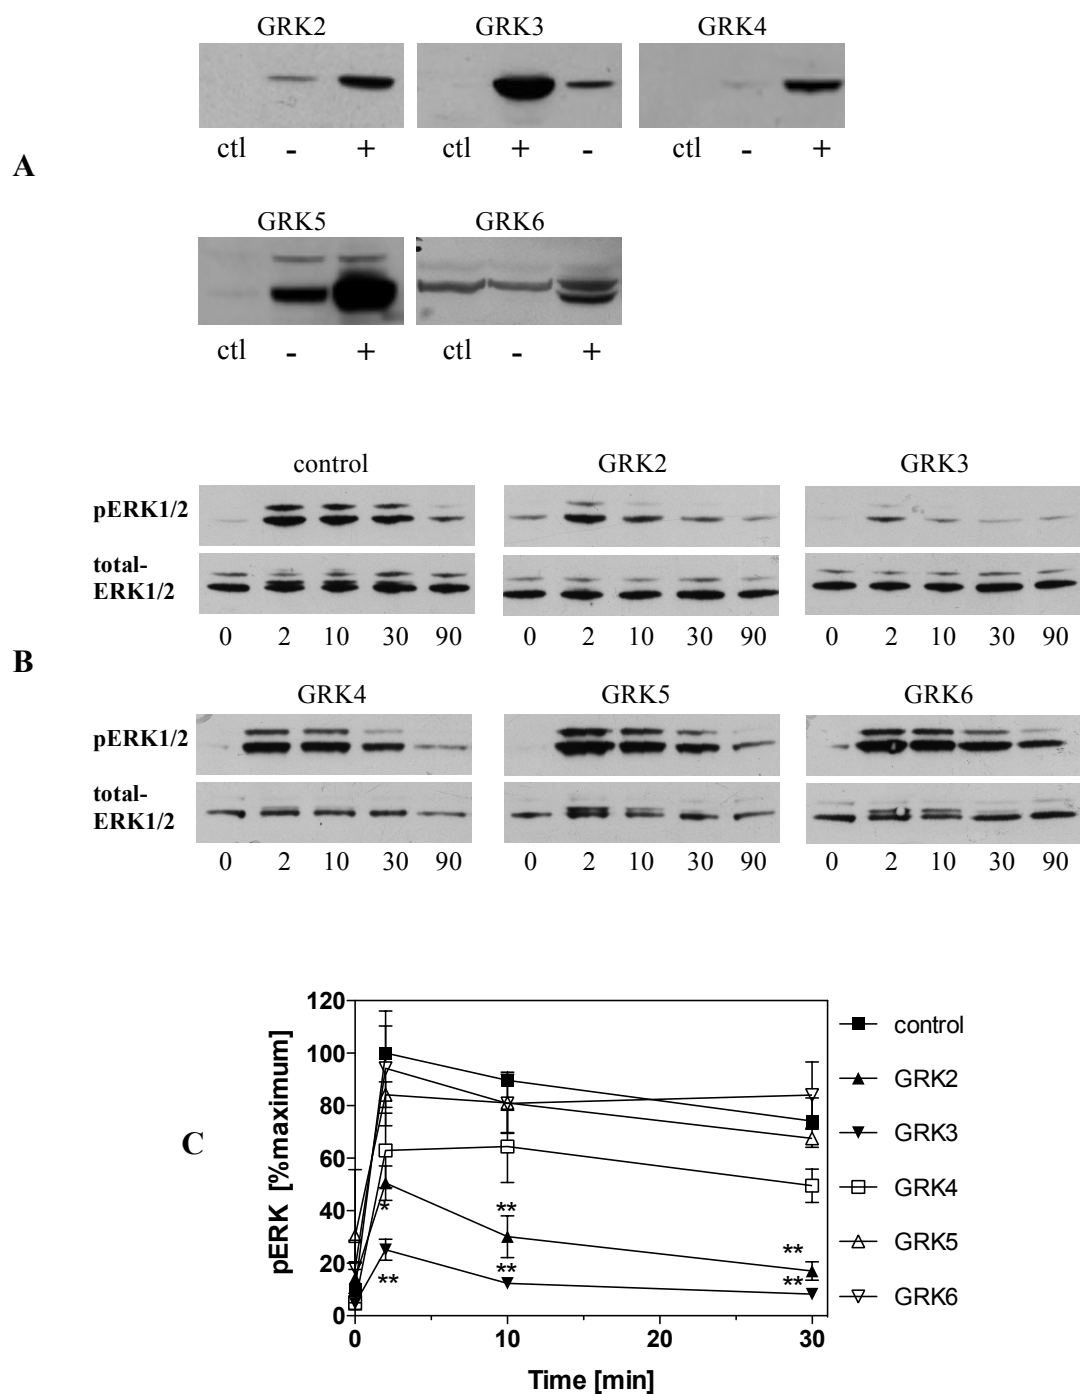

**Fig. S1.** Desensitization of ERK1/2 activation by GRKs 2-6. *A*, confluent monolayers of HEK 293 cells on 24-well plates stably expressing GRKs 2-6 were lysed and proteins (~20  $\mu$ g per lane) were immunoblotted as described under *Experimental Procedures*. GRKs 2-6 were detected with specific antibodies obtained from Santa Cruz Biotechnology (Heidelberg). Overexpression of GRKs was induced (+) or not (-) with 0.5  $\mu$ g/ml tetracycline. The control represents the endogenous level of the respective GRK in HEK 293 cells. *B*, cells expressing various GRKs or not (control) were transiently transfected with B<sub>2</sub>Rwt<sub>H</sub> and induced with tetracycline. 48 h later the cells were stimulated at 37°C with 1  $\mu$ M BK for the indicated times. After cell lysis phospho-ERK1/2 and total-ERK1/2 were determined via immunoblotting. *C*, respective bands were quantified by scanning densitometry. The phospho-ERK1/2 signals were normalized for total-ERK1/2 and are given in percentage of the activation after 2 min of control (=100%). Dunnett-Test. \*:p<0.05, \*\*:p<0.01.

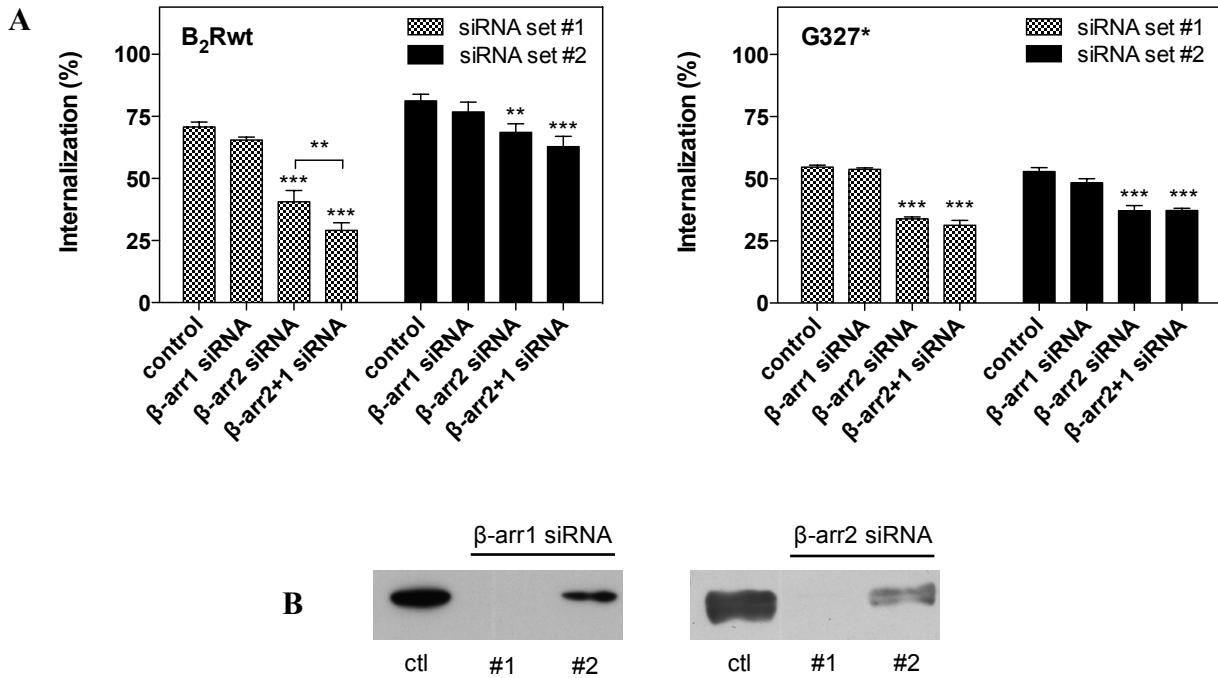

**Fig. S2.** Knockdown efficiency of two different sets of siRNAs (#1 and #2). *A*, HEK 293 cells stably expressing B<sub>2</sub>Rwt or G327\* were transfected with the indicated siRNAs. 72 h later internalization was determined with 5 nM [<sup>3</sup>H]BK (B<sub>2</sub>Rwt) or 1 nM [<sup>3</sup>H]BK (G327\*) after 5 min (B<sub>2</sub>Rwt) or 15 min (G327\*) as described in *Experimental Procedures*. Significance was determined by one-way ANOVA using Bonferroni's multiple comparison test. \*\*: p<0.01, \*\*\*: p<0.001. *B*, representative immunoblot of β-arrestin levels overexpressed in HEK 293 cells, silenced with the indicated siRNAs and probed with the respective antibodies for β-arrestin1 and 2.
